# Supplementary material
Source: PubMed Central journal article supplement (PMC5838579)
Supplement: jamaoncol-4-173-s001.pdf [file jamaoncol-4-173-s001.pdf]

## Supplementary Online Content

Barroso-Sousa R, Barry WT, Garrido-Castro AC, et al. Incidence of endocrine dysfunction following the use of different immune checkpoint inhibitor regimens: a systematic review and meta-analysis. *JAMA Oncol*. Published online September 28, 2017. doi:10.1001/jamaoncol.2017.3064

**eTable 1.** Incidence of endocrine dysfunctions in all studies included in the meta-analysis

**eTable 2.** Meta-regression model results for all grade hypothyroidism and hyperthyroidism

**eTable 3.** Meta-regression model results for any grade hypophysitis in patients with melanoma

**eFigure 1.** Funnel plots for ICI studies for all grades hypothyroidism, hyperthyroidism and hypophysitis

**eFigure 2.** Forest plots of the incidence of all grade hypophysitis during treatment with different ICI regimens

### eReferences

This supplementary material has been provided by the authors to give readers additional information about their work.

Incidence of endocrine dysfunction following the use of different immune checkpoint inhibitor regimens: a systematic review and meta-analysis

Romualdo Barroso-Sousa, MD, PhD, William T. Barry, PhD, Ana C. Garrido-Castro, MD, F. Stephen Hodi, MD, Le Min, MD, Ian E. Krop, MD, PhD, Sara M. Tolaney, MD, MPH

eTable 1. Incidence of endocrine dysfunctions in all studies included in the meta-analysis

eTable 2. Meta-regression model results for all grade hypothyroidism and hyperthyroidism

eTable 3. Meta-regression model results for any grade hypophysitis in patients with melanoma

eFigure 1. Funnel plots for ICI studies for all grades hypothyroidism, hyperthyroidism and hypophysitis

eFigure 2. Forest plots of the incidence of all grade hypophysitis during treatment with different ICI regimens

**eTable 1. Incidence of endocrine dysfunctions in all studies included in the meta-analysis**

| Study <sup>(reference)</sup>          | ICI regimen | Tumor type           | No of patients treated | Hypothyroidism |       | Hyperthyroidism |       | Hypophysitis |       | Adrenal Insufficiency |       | Insulin deficient diabetes |       |
|---------------------------------------|-------------|----------------------|------------------------|----------------|-------|-----------------|-------|--------------|-------|-----------------------|-------|----------------------------|-------|
|                                       |             |                      |                        | (all grades)   | G3 /4 | (all grades)    | G3 /4 | (all grades) | G3 /4 | (all grades)          | G3 /4 | (all grades)               | G3 /4 |
| Anti-PD-L1                            |             |                      |                        |                |       |                 |       |              |       |                       |       |                            |       |
| Fehrenbacher et al. 2016 <sup>1</sup> | Atezo       | NSCLC                | 142                    | 8              | 1     | 1               | 0     | 0            | 0     | 0                     | 0     | 0                          | 0     |
| NCT01375842                           | Atezo       | Solid tumors         | 558                    | 21             | 0     | 4               | 0     | 1            | 1     | 4                     | 2     | 0                          | 0     |
| Rosenberg et al. 2016 <sup>2</sup>    | Atezo       | Urothelial carcinoma | 310                    | 0              | 0     | 0               | 0     | 0            | 0     | 0                     | 0     | 0                          | 0     |
| Anti-PD-1                             |             |                      |                        |                |       |                 |       |              |       |                       |       |                            |       |
| Hamanishi et al. 2015 <sup>3</sup>    | Nivo        | Ovarian              | 20                     | 8              | 0     | NA              | NA    | NA           | NA    | NA                    | NA    | NA                         | NA    |
| Muro et al. 2016 <sup>4</sup>         | Pembro      | Gastric              | 39                     | 5              | 1     | 3               | 0     | 0            | 0     | 0                     | 0     | 0                          | 0     |
| Robert et al. 2015 <sup>5</sup>       | Pembro      | Melanoma             | 555                    | 52             | 1     | 27              | 0     | 3            | 2     | 0                     | 0     | 2                          | 0     |
| Larkin et al. 2015 <sup>6</sup>       | Nivo        | Melanoma             | 313                    | 27             | 0     | 13              | 0     | 2            | 1     | NA                    | NA    | NA                         | NA    |
| Herbst et al. 2015 <sup>7</sup>       | Pembro      | NSCLC                | 682                    | 56             | 0     | 32              | 1     | 2            | 2     | 5                     | 1     | 3                          | 2     |
| Weber et al. 2016 <sup>8</sup>        | Nivo        | Melanoma             | 61                     | 5              | 0     | 3               | 0     | 0            | 0     | 4                     | 2     | 0                          | 0     |
| Motzer et al.                         | Nivo        | RCC                  | 406                    | 33             | 2     | 10              | 0     | 2            | 1     | 8                     | 3     | 6                          | 3     |

|                                     |        |               |     |    |    |   |    |    |    |    |    |    |    |
|-------------------------------------|--------|---------------|-----|----|----|---|----|----|----|----|----|----|----|
| 2015 <sup>9</sup>                   |        |               |     |    |    |   |    |    |    |    |    |    |    |
| Ribas et al. 2015 <sup>10</sup>     | Pembro | Melanoma      | 357 | 26 | 0  | 9 | 0  | 2  | 1  | 0  | 0  | 0  | 0  |
| Garon et al. 2015 <sup>11</sup>     | Pembro | NSCLC         | 495 | 34 | NA | 9 | NA |
| Seiwert et al. 2016 <sup>12</sup>   | Pembro | Head and Neck | 60  | 4  | 0  | 1 | 0  | 0  | 0  | 2  | 0  | 0  | 0  |
| Patnaik et al. 2015 <sup>13</sup>   | Pembro | Solid tumors  | 30  | 2  | 0  | 0 | 0  | 0  | 0  | 0  | 0  | 0  | 0  |
| Borghaei et al. 2015 <sup>14</sup>  | Nivo   | NSCLC         | 287 | 19 | 0  | 4 | 0  | 0  | 0  | 0  | 0  | 0  | 0  |
| Motzer et al. 2015 <sup>15</sup>    | Nivo   | RCC           | 167 | 10 | 1  | 0 | 0  | 0  | 0  | 0  | 0  | 0  | 0  |
| Gettinger et al. 2016 <sup>16</sup> | Nivo   | NSCLC         | 52  | 3  | 0  | 1 | 0  | 0  | 0  | 1  | 0  | 0  | 0  |
| Weber et al. 2015 <sup>17</sup>     | Nivo   | Melanoma      | 268 | 15 | 0  | 5 | 0  | NA | NA | NA | NA | NA | NA |
| Robert et al. 2015 <sup>18</sup>    | Nivo   | Melanoma      | 206 | 9  | 0  | 7 | 1  | 1  | 1  | 0  | 0  | 1  | 0  |
| Robert et al. 2014 <sup>19</sup>    | Pembro | Melanoma      | 173 | 7  | 0  | 3 | 0  | 2  | 1  | 1  | 1  | 0  | 0  |
| Brahmer et al. 2015 <sup>20</sup>   | Nivo   | NSCLC         | 131 | 5  | 0  | 0 | 0  | 0  | 0  | 0  | 0  | 0  | 0  |
| Nanda et al. 2016 <sup>21</sup>     | Pembro | Breast        | 32  | 1  | 0  | 0 | 0  | 0  | 0  | 0  | 0  | 0  | 0  |
| Antonia et al. 2016 <sup>22</sup>   | Nivo   | SCLC          | 98  | 3  | 0  | 2 | 0  | 0  | 0  | 0  | 0  | 0  | 0  |
| Rivzi et al. 2015 <sup>23</sup>     | Nivo   | NSCLC         | 117 | 3  | 0  | 0 | 0  | 0  | 0  | 1  | 1  | 0  | 0  |
| Brahmer et al.                      | Nivo   | Solid tumors  | 39  | 1  | 0  | 0 | 0  | 0  | 0  | 0  | 0  | 0  | 0  |

|                                    |        |                       |     |    |   |   |   |    |    |    |    |    |    |
|------------------------------------|--------|-----------------------|-----|----|---|---|---|----|----|----|----|----|----|
| 2010 <sup>24</sup>                 |        |                       |     |    |   |   |   |    |    |    |    |    |    |
| Topalian et al. 2012 <sup>25</sup> | Nivo   | Advanced solid tumors | 296 | 7  | 1 | 3 | 1 | NA | NA | 0  | 0  | 0  | 0  |
| Nghiem et al. 2016 <sup>26</sup>   | Pembro | Merkel carcinoma      | 26  | 0  | 0 | 0 | 0 | 0  | 0  | 0  | 0  | 0  | 0  |
| Shimizu et al. 2016 <sup>27</sup>  | Pembro | Solid tumors          | 10  | 0  | 0 | 0 | 0 | 0  | 0  | 0  | 0  | 0  | 0  |
| Wolchok et al. 2013 <sup>28</sup>  | Nivo   | Melanoma              | 33  | 1  | 0 | 0 | 0 | 1  | 1  | 1  | 1  | 0  | 0  |
| Anti-CTLA-4                        |        |                       |     |    |   |   |   |    |    |    |    |    |    |
| Postow et al. 2015 <sup>29</sup>   | Ipi    | Melanoma              | 46  | 7  | 0 | 0 | 0 | 3  | 2  | 2  | 1  | 0  | 0  |
| Yamazaki et al. 2015 <sup>30</sup> | Ipi    | Melanoma              | 20  | 1  | 0 | 0 | 0 | 1  | 0  | 0  | 0  | 1  | 1  |
| Larkin et al. 2015 <sup>6</sup>    | Ipi    | Melanoma              | 311 | 13 | 0 | 3 | 0 | 12 | 6  | NA | NA | NA | NA |
| Robert et al. 2015 <sup>5</sup>    | Ipi    | Melanoma              | 256 | 5  | 0 | 6 | 1 | 6  | 4  | 0  | 0  | 0  | 0  |
| Hodi et al. 2010 <sup>31</sup>     | Ipi    | Melanoma              | 131 | 2  | 0 | 0 | 0 | 2  | 2  | 2  | 0  | 0  | 0  |
| Zimmer et al. 2015 <sup>32</sup>   | Ipi    | Melanoma              | 103 | 1  | 0 | 0 | 0 | 4  | 1  | 0  | 0  | 0  | 0  |
| Zimmer et al. 2015 <sup>33</sup>   | Ipi    | Melanoma              | 53  | 0  | 0 | 1 | 0 | 0  | 0  | 0  | 0  | 0  | 0  |
| Le et al. 2013 <sup>34</sup>       | Ipi    | Pancreas              | 15  | 0  | 0 | 0 | 0 | 2  | 0  | 0  | 0  | 0  | 0  |
| Yang et al. 2007 <sup>35</sup>     | Ipi    | RCC                   | 61  | 0  | 0 | 0 | 0 | 2  | NA | 1  | NA | 0  | 0  |
| O'Mahony et al. 2007 <sup>36</sup> | Ipi    | Solid tumors          | 11  | 0  | 0 | 0 | 0 | 0  | 0  | 0  | 0  | 0  | 0  |

|                                   |            |                  |      |     |   |     |    |    |    |    |    |    |    |
|-----------------------------------|------------|------------------|------|-----|---|-----|----|----|----|----|----|----|----|
| Maki et al. 2013 <sup>37</sup>    | Ipi        | Synovial Sarcoma | 6    | 0   | 0 | 0   | 0  | 0  | 0  | 0  | 0  | 0  | 0  |
| Combination*                      |            |                  |      |     |   |     |    |    |    |    |    |    |    |
| Wolchok et al. 2013 <sup>28</sup> | Concurrent | Melanoma         | 53   | 2   | 0 | 2   | NA | 2  | 1  | 2  | 0  | 0  | 0  |
| Postow et al. 2015 <sup>29</sup>  | Concurrent | Melanoma         | 94   | 15  | 0 | 4   | 0  | 11 | 2  | 6  | 1  | 0  | 0  |
| Larkin et al. 2015 <sup>6</sup>   | Concurrent | Melanoma         | 313  | 47  | 1 | 31  | 3  | 24 | 5  | NA | NA | NA | NA |
| Antonia et al. 2016 <sup>22</sup> | Concurrent | SCLC             | 115  | 14  | 1 | 10  | 0  | 0  | 0  | 3  | 1  | 0  | 0  |
| TOTAL                             |            |                  | 7689 | 502 | 9 | 194 | 7  | 92 | 36 | 52 | 17 | 13 | 6  |

Abbreviations: Atezo, Atezolizumab; CTLA-4, Cytotoxic T-Lymphocyte Associated Protein 4; ICI, immune checkpoint inhibitor; IPI, Ipilimumab; NA, not available; NSCLC, non-small cell lung cancer; PD-1, programmed cell death 1; PD-L1, programmed cell death ligand 1; Nivo, Nivolumab; Pembro, Pembrolizumab; RCC, renal cell carcinoma; SCLC, small cell lung cancer. \*Combination = nivolumab plus ipilimumab.

**eTable 2. Meta-regression model results for all grade hypothyroidism and hyperthyroidism**

| All grade hypothyroidism  |                                    |                        |                |
|---------------------------|------------------------------------|------------------------|----------------|
| Variable                  | Predicted Incidence, %<br>(95% PI) | Odds ratio<br>(95% CI) | <i>P</i> Value |
| ICI regimens              |                                    |                        |                |
| CTLA-4                    | 3.8 (1.9 - 7.8)                    | Reference              |                |
| PD-1                      | 7.0 (3.9 - 12.3)                   | 1.89 (1.17 - 3.05)     | 0.0089         |
| PD-L1                     | 3.9 (1.7 - 8.4)                    | 1.01 (0.49 - 2.07)     | 0.9861         |
| Combination*              | 13.2 (6.9 - 23.8)                  | 3.81 (2.10 - 6.91)     | <.0001         |
| All grade hyperthyroidism |                                    |                        |                |
| Variable                  | Predicted Incidence, %<br>(95% PI) | Odds ratio<br>(95% CI) | <i>P</i> Value |
| ICI regimens              |                                    |                        |                |
| CTLA-4                    | 1.7 (0.8 - 3.8)                    | Reference              |                |
| PD-1                      | 3.2 (1.7 - 5.7)                    | 1.89 (1.02 - 3.52)     | 0.0438         |
| PD-L1                     | 0.6 (0.2 - 1.8)                    | 0.35 (0.12 - 1.07)     | 0.0653         |
| Combination*              | 8.0 (4.1 - 15.3)                   | 5.07 (2.45 - 10.52)    | <.0001         |
| PD-1 agent                |                                    |                        |                |
| Nivolumab                 | 2.5 (1.3 - 4.6)                    | Reference              |                |
| Pembrolizumab             | 3.8 (2.1 - 6.9)                    | 1.56 (1.01 - 2.39)     | 0.0428         |

Abbreviations: CI, Confidence interval; CTLA-4, Cytotoxic T-Lymphocyte Associated Protein-4; PD-1, programmed cell death-1; PD-L1, programmed cell death ligand-1; PI, Prediction interval; \*Combination = nivolumab plus ipilimumab.

**eTable 3. Meta-regression model results for any grade hypophysitis in patients with melanoma**

| Class        | Predicted Incidence, %<br>(95% PI) | Odds ratio (95% CI) | <i>P</i> Value |
|--------------|------------------------------------|---------------------|----------------|
| ICI regimens |                                    |                     |                |
| CTLA-4       | 3.8 (2.7 - 5.2)                    | Reference           |                |
| PD-1         | 1.1 (0.8 - 1.6)                    | 0.29 (0.18 - 0.49)  | <.0001         |
| Combination  | 8.0 (5.9 - 10.8)                   | 2.24 (1.39 - 3.60)  | 0.0009         |

Abbreviations: CTLA-4, Cytotoxic T-Lymphocyte Associated Protein 4; PD-1, programmed cell death 1; PD-L1, programmed cell death ligand 1; \*Combination = nivolumab plus ipilimumab.



**Figure 1. Funnel Plots for ICI Studies included in the meta-analysis for all grades hypothyroidism, hyperthyroidism and hypophysitis**

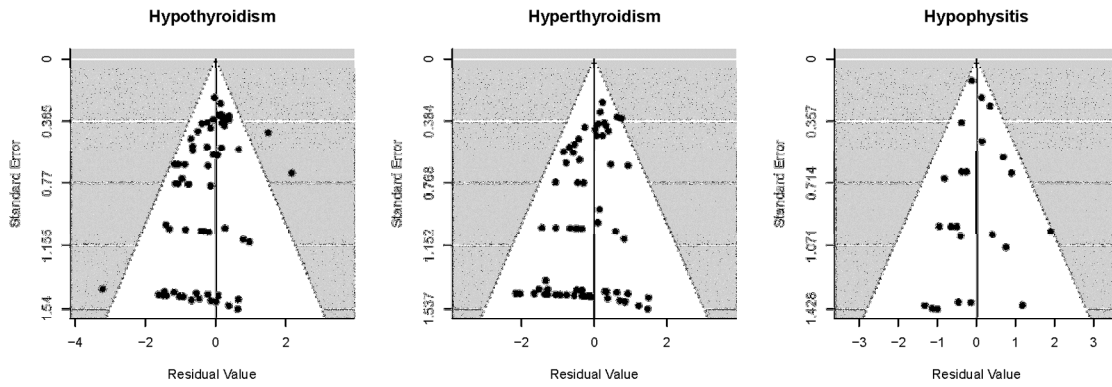

**eFigure 2. Forest plots of the incidence of all grade hypophysitis during treatment with different ICI regimens**

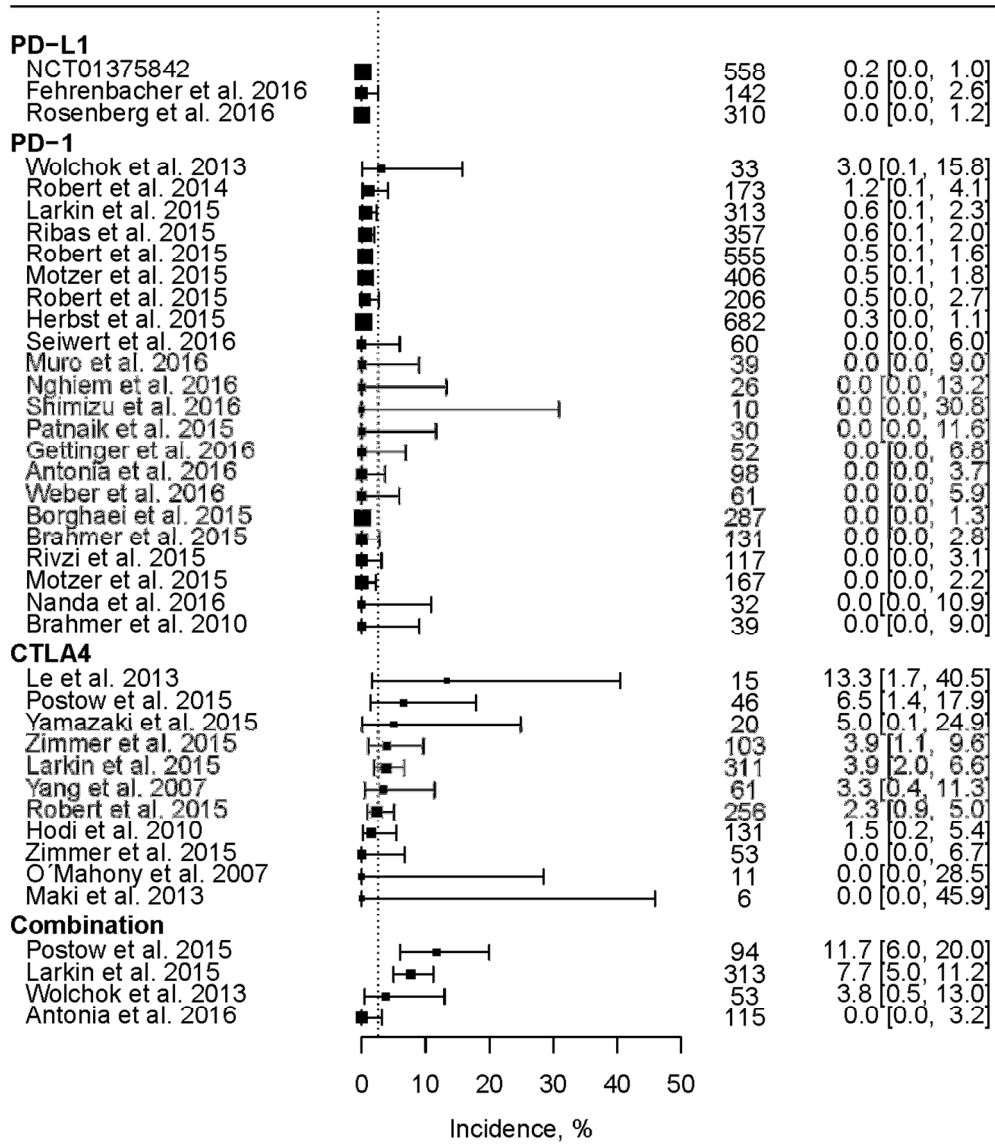

Abbreviations: CTLA4, Cytotoxic T-Lymphocyte Associated Protein-4; PD-1, programmed cell death-1; PD-L1, programmed cell death ligand-1; Combination = nivolumab plus ipilimumab.

Study-level data are displayed as box-and-whiskers using binomial exact 95% confidence intervals.

## References

1. Fehrenbacher L, Spira A, Ballinger M, et al. Atezolizumab versus docetaxel for patients with previously treated non-small-cell lung cancer (POPLAR): a multicentre, open-label, phase 2 randomised controlled trial. *Lancet*. 2016;387(10030):1837-1846.
2. Rosenberg JE, Hoffman-Censits J, Powles T, et al. Atezolizumab in patients with locally advanced and metastatic urothelial carcinoma who have progressed following treatment with platinum-based chemotherapy: a single-arm, multicentre, phase 2 trial. *Lancet*. 2016;387(10031):1909-1920.
3. Hamanishi J, Mandai M, Ikeda T, et al. Safety and Antitumor Activity of Anti-PD-1 Antibody, Nivolumab, in Patients With Platinum-Resistant Ovarian Cancer. *J Clin Oncol*. 2015;33(34):4015-4022.
4. Muro K, Chung HC, Shankaran V, et al. Pembrolizumab for patients with PD-L1-positive advanced gastric cancer (KEYNOTE-012): a multicentre, open-label, phase 1b trial. *Lancet Oncol*. 2016;17(6):717-726.
5. Robert C, Schachter J, Long GV, et al. Pembrolizumab versus Ipilimumab in Advanced Melanoma. *N Engl J Med*. 2015;372(26):2521-2532.
6. Larkin J, Chiarion-Sileni V, Gonzalez R, et al. Combined Nivolumab and Ipilimumab or Monotherapy in Untreated Melanoma. *N Engl J Med*. 2015;373(1):23-34.
7. Herbst RS, Baas P, Kim DW, et al. Pembrolizumab versus docetaxel for previously treated, PD-L1-positive, advanced non-small-cell lung cancer (KEYNOTE-010): a randomised controlled trial. *Lancet*. 2016;387(10027):1540-1550.
8. Weber J, Gibney G, Kudchadkar R, et al. Phase I/II Study of Metastatic Melanoma Patients Treated with Nivolumab Who Had Progressed after Ipilimumab. *Cancer Immunol Res*. 2016;4(4):345-353.
9. Motzer RJ, Escudier B, McDermott DF, et al. Nivolumab versus Everolimus in Advanced Renal-Cell Carcinoma. *N Engl J Med*. 2015;373(19):1803-1813.
10. Ribas A, Puzanov I, Dummer R, et al. Pembrolizumab versus investigator-choice chemotherapy for ipilimumab-refractory melanoma (KEYNOTE-002): a randomised, controlled, phase 2 trial. *Lancet Oncol*. 2015;16(8):908-918.
11. Garon EB, Rizvi NA, Hui R, et al. Pembrolizumab for the treatment of non-small-cell lung cancer. *N Engl J Med*. 2015;372(21):2018-2028.
12. Seiwert TY, Burtneß B, Mehra R, et al. Safety and clinical activity of pembrolizumab for treatment of recurrent or metastatic squamous cell carcinoma of the head and neck (KEYNOTE-012): an open-label, multicentre, phase 1b trial. *Lancet Oncol*. 2016;17(7):956-965.
13. Patnaik A, Kang SP, Rasco D, et al. Phase I Study of Pembrolizumab (MK-3475; Anti-PD-1 Monoclonal Antibody) in Patients with Advanced Solid Tumors. *Clin Cancer Res*. 2015;21(19):4286-4293.
14. Borghaei H, Paz-Ares L, Horn L, et al. Nivolumab versus Docetaxel in Advanced Nonsquamous Non-Small-Cell Lung Cancer. *N Engl J Med*. 2015;373(17):1627-1639.

15. Motzer RJ, Rini BI, McDermott DF, et al. Nivolumab for Metastatic Renal Cell Carcinoma: Results of a Randomized Phase II Trial. *J Clin Oncol*. 2015;33(13):1430-1437.
16. Gettinger S, Rizvi NA, Chow LQ, et al. Nivolumab Monotherapy for First-Line Treatment of Advanced Non-Small-Cell Lung Cancer. *J Clin Oncol*. 2016;34(25):2980-2987.
17. Weber JS, D'Angelo SP, Minor D, et al. Nivolumab versus chemotherapy in patients with advanced melanoma who progressed after anti-CTLA-4 treatment (CheckMate 037): a randomised, controlled, open-label, phase 3 trial. *Lancet Oncol*. 2015;16(4):375-384.
18. Robert C, Long GV, Brady B, et al. Nivolumab in previously untreated melanoma without BRAF mutation. *N Engl J Med*. 2015;372(4):320-330.
19. Robert C, Ribas A, Wolchok JD, et al. Anti-programmed-death-receptor-1 treatment with pembrolizumab in ipilimumab-refractory advanced melanoma: a randomised dose-comparison cohort of a phase 1 trial. *Lancet*. 2014;384(9948):1109-1117.
20. Brahmer J, Reckamp KL, Baas P, et al. Nivolumab versus Docetaxel in Advanced Squamous-Cell Non-Small-Cell Lung Cancer. *N Engl J Med*. 2015;373(2):123-135.
21. Nanda R, Chow LQ, Dees EC, et al. Pembrolizumab in Patients With Advanced Triple-Negative Breast Cancer: Phase Ib KEYNOTE-012 Study. *J Clin Oncol*. 2016;34(21):2460-2467.
22. Antonia SJ, Lopez-Martin JA, Bendell J, et al. Nivolumab alone and nivolumab plus ipilimumab in recurrent small-cell lung cancer (CheckMate 032): a multicentre, open-label, phase 1/2 trial. *Lancet Oncol*. 2016;17(7):883-895.
23. Rizvi NA, Mazieres J, Planchard D, et al. Activity and safety of nivolumab, an anti-PD-1 immune checkpoint inhibitor, for patients with advanced, refractory squamous non-small-cell lung cancer (CheckMate 063): a phase 2, single-arm trial. *Lancet Oncol*. 2015;16(3):257-265.
24. Brahmer JR, Drake CG, Wollner I, et al. Phase I study of single-agent anti-programmed death-1 (MDX-1106) in refractory solid tumors: safety, clinical activity, pharmacodynamics, and immunologic correlates. *J Clin Oncol*. 2010;28(19):3167-3175.
25. Topalian SL, Hodi FS, Brahmer JR, et al. Safety, activity, and immune correlates of anti-PD-1 antibody in cancer. *N Engl J Med*. 2012;366(26):2443-2454.
26. Nghiem PT, Bhatia S, Lipson EJ, et al. PD-1 Blockade with Pembrolizumab in Advanced Merkel-Cell Carcinoma. *N Engl J Med*. 2016;374(26):2542-2552.
27. Shimizu T, Seto T, Hirai F, et al. Phase 1 study of pembrolizumab (MK-3475; anti-PD-1 monoclonal antibody) in Japanese patients with advanced solid tumors. *Invest New Drugs*. 2016;34(3):347-354.
28. Wolchok JD, Kluger H, Callahan MK, et al. Nivolumab plus ipilimumab in advanced melanoma. *N Engl J Med*. 2013;369(2):122-133.
29. Postow MA, Chesney J, Pavlick AC, et al. Nivolumab and ipilimumab versus ipilimumab in untreated melanoma. *N Engl J Med*. 2015;372(21):2006-2017.

30. Yamazaki N, Kiyohara Y, Uhara H, et al. Phase II study of ipilimumab monotherapy in Japanese patients with advanced melanoma. *Cancer Chemother Pharmacol.* 2015;76(5):997-1004.
31. Hodi FS, O'Day SJ, McDermott DF, et al. Improved survival with ipilimumab in patients with metastatic melanoma. *N Engl J Med.* 2010;363(8):711-723.
32. Zimmer L, Eigentler TK, Kiecker F, et al. Open-label, multicenter, single-arm phase II DeCOG-study of ipilimumab in pretreated patients with different subtypes of metastatic melanoma. *J Transl Med.* 2015;13:351.
33. Zimmer L, Vaubel J, Mohr P, et al. Phase II DeCOG-study of ipilimumab in pretreated and treatment-naive patients with metastatic uveal melanoma. *PloS one.* 2015;10(3):e0118564.
34. Le DT, Lutz E, Uram JN, et al. Evaluation of ipilimumab in combination with allogeneic pancreatic tumor cells transfected with a GM-CSF gene in previously treated pancreatic cancer. *J Immunother.* 2013;36(7):382-389.
35. Yang JC, Hughes M, Kammula U, et al. Ipilimumab (anti-CTLA4 antibody) causes regression of metastatic renal cell cancer associated with enteritis and hypophysitis. *J Immunother.* 2007;30(8):825-830.
36. O'Mahony D, Morris JC, Quinn C, et al. A pilot study of CTLA-4 blockade after cancer vaccine failure in patients with advanced malignancy. *Clin Cancer Res.* 2007;13(3):958-964.
37. Maki RG, Jungbluth AA, Gnjatic S, et al. A Pilot Study of Anti-CTLA4 Antibody Ipilimumab in Patients with Synovial Sarcoma. *Sarcoma.* 2013;2013:168145.
